# Supplementary material for: Automated Optimized Synthesis of [18F]FLT Using Non-Basic Phase-Transfer Catalyst with Reduced Precursor Amount
Source: MDPI journal article supplement (doi:10.3390/molecules27238323), 2022-11-29
Supplement: s1 [file s1]

Supporting information to  
Automated optimized synthesis of [ $^{18}\text{F}$ ]FLT using non-basic phase-transfer catalyst with  
reduced precursor amount

O. S. Fedorova, V. V. Orlovskaya, R. N. Krasikova

*N.P.Bechtereva Institute of the Human Brain, 197376 St.-Petersburg, Russia;*

**Table S1.** Reaction time screen. Conditions: 4 mg (4.8  $\mu\text{mol}$ ) of **I**; 2 mg (4.8  $\mu\text{mol}$ ) of TBAOTs, acetonitrile, 110  $^{\circ}\text{C}$ , remote-controlled procedure.

| Peak assignment                             | The ratio of products at a given reaction time, measured by radio-TLC, % |        |        |
|---------------------------------------------|--------------------------------------------------------------------------|--------|--------|
|                                             | 5 min                                                                    | 10 min | 20 min |
| [ $^{18}\text{F}$ ]fluoride                 | 46                                                                       | 39     | 30     |
| [ $^{18}\text{F}$ ]labelled side product    | 2                                                                        | 9      | 18     |
| [ $^{18}\text{F}$ ]fluorinated intermediate | 52                                                                       | 52     | 52     |

**Table S2.** Radiochemical yield (RCY, EOB, corrected for decay) of the [ $^{18}\text{F}$ ]FLT and radioTLC data for analysis of the waste obtained after passing hydrolysate through different HLB cartridges (average from three runs).

| Cartridge type                     | Synthesis time, min | RCY, %, EOB | TLC analysis of combined waste |                           |
|------------------------------------|---------------------|-------------|--------------------------------|---------------------------|
|                                    |                     |             | [ $^{18}\text{F}$ ]F, %        | [ $^{18}\text{F}$ ]FLT, % |
| OASIS PRIME HLB Plus Light, 100 mg | 57 $\pm$ 2          | 15 $\pm$ 3  | 92-95                          | 5-8                       |
| OASIS HLB 3cc, 60 mg, barrel-type  | 52 $\pm$ 2          | 14 $\pm$ 2  | 60-67                          | 33-40                     |
| OASIS HLB 6cc, 200 mg, barrel-type | 52 $\pm$ 1          | 16 $\pm$ 2  | 100                            | 0                         |

**Table S3.** Quality control (QC) test data summary for three validation batches.

| Quality control test                               | Ph.Eur.9.0 [23] | Validation batch 1 | Validation batch 2 | Validation batch 3 |
|----------------------------------------------------|-----------------|--------------------|--------------------|--------------------|
| Radiochemical yield, corrected for decay (%)       | Not applicable  | 15.7               | 17.0               | 16.1               |
| Molar activity (GBq/ $\mu\text{mol}$ )             | Not applicable  | 72                 | 140                | 99                 |
| Radionuclidic identity (half-life, min)            | 105-115         | 110.2              | 111.3              | 110.5              |
| Radiochemical purity, % (measured by HPLC and TLC) | >95             | >99                | >99                | >99                |
| pH                                                 | 4.5 to 8.5      | 7.5                | 7.3                | 7.0                |

|                                      |                                               |      |      |      |
|--------------------------------------|-----------------------------------------------|------|------|------|
| Ethanol determination (% V/V)        | <10% or 2.5 g per administration              | 4.75 | 4.75 | 4.75 |
| Residual solvent (acetonitrile), ppm | <400                                          | 50   | 68   | 65   |
| Thymine (µg/ml)                      | Any other impurities, for each one <0.1 mg/V* | 0.41 | 0.35 | 0.15 |
| Thymidine (µg/ml)                    |                                               | 0.71 | 0.90 | 0.99 |
| Stavudine (µg/ml)                    | <0.1 mg/V*                                    | 0.54 | 0.33 | 0.65 |
| Fluorothymidine (µg/ml)              | <0.1 mg/V*                                    | 1.10 | 0.82 | 1.11 |
| Tetrabutylammonium (µg/ml)           | <2.6 mg/V*                                    | Pass | Pass | Pass |
| Bacterial endotoxin (EU/ml)          | <175/V*                                       | Pass | Pass | Pass |
| Sterility                            | Sterile                                       | Pass | Pass | Pass |

\*V – maximum recommended dose in ml. The volume of the final formulation of [<sup>18</sup>F]FLT - 16 ml.

23. Alovudine (18F) injection. 01/2014:2460. European Pharmacopoeia 9.0. 1127-1129.
